# Supplementary material for: A1S_2811, a CheA/Y‐like hybrid two‐component regulator from Acinetobacter baumannii ATCC17978, is involved in surface motility and biofilm formation in this bacterium
Source: PubMed Central journal article supplement (PMC5635159; doi:10.1002/mbo3.510), 2017-07-17
Supplement: MBO3-6-na-s001.pdf [file MBO3-6-na-s001.pdf]

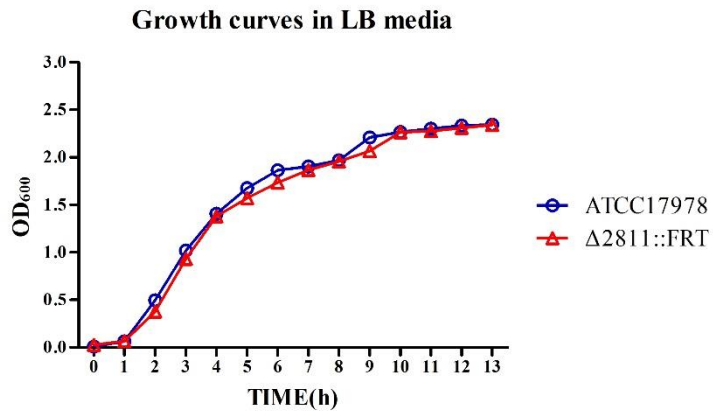

**Figure S1.** ATCC17978 and mutant  $\Delta 2811::FRT$  growth curves in LB broth.

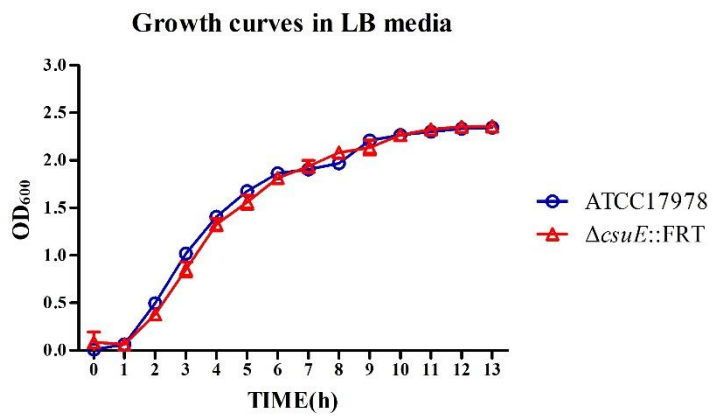

**Figure S2.** ATCC17978 and mutant  $\Delta csuE::FRT$  growth curves in LB broth.
